# Supplementary material
Source: MDPI journal article supplement (https://www.mdpi.com/2073-4441/9/7/515)
Supplement: s1 [file s1]

## Sheet: Phytoplankton
Table S1	Phytoplankton
Biomass of main phytoplankton groups in lakes Halsjärvi and Valkea-Kotinen during June-August in 2004-2007
	HALSJÄRVI	BIOMASS, mg C/m3								VALKEA-KOTINEN		BIOMASS, mg C/m3
Date	Cyanophyceae	Cryptophyceae	Dinophyceae	Chrysophyceae	Diatomophyceae	Chloromonadophyceae	Chlorophyceae	Tot biom.		Cyanophyceae	Cryptophyceae	Dinophyceae	Chrysophyceae	Diatomophyceae	Chloromonadophyceae	Chlorophyceae	Tot biom.
2004-06-08	0.288412	18.3549	22.6102	29.6862	2.11834	0	3.60624	78.0614		0.6844	8.247	3.48	29.47	2.488	91.37	2.454	144.201
2004-06-15	0	12.7648	6.59269	25.3737	6.21319	0	4.52449	57.4231		0	2.026	7.112	50.38	32.47	34.35	3.251	142.455
2004-06-21	0.306518	10.0378	4.0392	27.3804	9.70306	2.60304	3.5365	58.4448		0.1682	19.67	3.445	46.69	21.34	102.6	2.582	265.426
2004-06-29	0.929606	12.5563	3.01145	32.723	8.05596	1.04122	2.20696	62.8416		0.3526	4.333	3.687	18.54	3.873	104.4	5.356	177.984
2004-07-06	1.4467	10.3603	9.51456	39.0148	7.60177	4.68547	2.35946	77.3857		0.4902	5.755	4.206	48.89	2.515	120.8	3.074	197.765
2004-07-13	0.768757	10.161	8.30729	24.3454	8.66812	1.04122	6.70547	63.0104		0.1456	9.721	10.97	7.393	0.6468	172.3	1.352	207.3
2004-07-19	4.22072	13.5897	14.2625	21.8291	4.44043	3.64426	2.43772	67.2998		0	5.68	20.47	12.69	0.1766	174.7	1.754	220.8
2004-07-27	1.09489	11.6867	12.1578	16.0276	7.49047	5.72669	3.59273	60.6396		0	11.87	20.43	6.34	1.137	220.5	4.179	272.829
2004-08-03	2.25539	12.5809	20.4606	18.3881	8.93516	8.85034	3.67269	78.4631		0	16.13	31.32	7.835	4.619	339.3	4.603	409.329
2004-08-10	3.01088	19.2376	0.704616	14.6361	4.53019	18.7419	2.55634	69.4038		0	9.666	17.49	14.22	23.78	200.2	8.171	284.615
2004-08-17	0.558872	11.7261	5.19262	20.5252	6.3595	34.8807	3.15435	84.7674		0	5.048	43.56	15.55	21.98	139.2	1.215	236.152
2005-06-07	0.148694	17.9829	5.65021	8.83933	2.47715	3.64426	0.955754	42.1085		0.1305	11.37	11.01	3.042	4.621	313.3	4.187	362.562
2005-06-14	0	22.5671	6.18877	2.71818	1.2521	5.20608	2.0199	41.1253		1.059	13.56	1.681	14.19	1.064	156.6	5.139	216.633
2005-06-20	0.006732	13.9408	1.46704	4.80096	0.832075	3.12365	1.88259	26.977		0.7781	3.298	3.918	23.41	6.078	243.7	2.94	299.371
2005-06-28	0	13.8598	8.19904	6.77425	2.26008	3.12365	1.47272	37.0285		0.3429	3.388	31.5	10.16	4.504	190.2	3.102	265.551
2005-07-04	0.0556512	10.3205	6.98782	7.27342	7.52593	0.520608	7.73678	41.6178		0	5.077	48.44	16.34	3.246	130.5	5.489	231.067
2005-07-12	0.229786	18.7644	11.2864	33.2802	10.3059	0	10.6	86.7572		0	6.019	40.53	4.496	3.628	223.4	1.092	287.533
2005-07-19	3.26924	32.3775	25.1235	16.8091	20.6296	0.520608	9.68328	113.311		0	12.31	44.48	4.177	3.434	159.2	1.167	233.911
2005-07-26	0.139718	11.8734	10.1784	14.8742	44.3938	0	14.8285	102.012		0	17.73	0.6145	8.487	13.48	231.2	5.859	285.882
2005-08-02	0.646388	10.5652	4.53288	21.4864	98.8924	1.56182	16.9171	158.512		0.04734	6.258	0.5866	6.548	2.723	137.6	6.253	164.6
2005-08-09	0.170544	5.87464	10.2729	43.6385	118.202	0.520608	15.179	200.603		0.2373	10.38	2.415	9.737	1.226	120.7	5.093	159.832
2005-08-16	0.776989	5.84951	4.7124	31.6333	130.754	3.12365	16.9418	198.462		0.4886	12.9	7.507	10.62	3.975	78.3	1.844	129.993
2006-06-06	0.040392	19.3529	10.2233	20.2539	2.41544	15.0976	0.268193	69.4452		0.3017	11.28	23.73	78.03	0.8484	13.05	10.65	145.792
2006-06-13	0.08633	11.6978	5.21426	27.9603	8.44199	7.35517	0.767391	63.8057		0	34.14	39.93	27.55	1.786	0	71.69	180.707
2006-06-19	0.129495	20.1394	3.73196	35.1125	6.0399	5.96785	0.939694	74.7044		0.3727	38.39	5.267	11.04	3.807	27.69	5.882	104.692
2006-06-27	0	41.7998	14.3616	30.4897	14.9698	3.64426	3.69482	112.894		0	21.54	22.94	2.688	3.946	20.88	5.333	84.5896
2006-07-04	0.667199	30.429	11.2153	26.2612	37.6769	1.04122	3.98766	117.63		0	22.51	86.99	16.78	23.86	73.1	2.738	240.239
2006-07-11	0.515056	13.4646	20.4606	22.5767	25.9186	0	2.1164	90.8429		0.1131	11.08	4.248	108.4	2.009	94.26	1.216	245.086
2006-07-18	1.93492	15.0279	21.5686	46.5198	48.606	6.7679	7.19561	156.831		0	1.098	1.592	377.2	1.148	32.63	3.269	431.047
2006-07-25	0.816176	21.9735	33.632	29.8212	39.947	13.0152	8.70033	151.055		0.182	5.242	4.549	22.62	2.422	195.8	6.091	264.006
2006-08-01	4.11845	8.90094	19.6079	23.5684	27.0057	13.0152	3.99915	105.77		0.5308	2.165	2.062	23.89	0.9802	148	2.135	195.588
2006-08-08	0.104122	40.7804	30.4549	15.2657	12.1995	6.2473	4.59097	113.55		0	1.733	3.919	24.04	1.7	67.68	2.563	122.275
2006-08-15	0.628731	7.33968	26.928	18.0733	14.7751	30.7159	3.25891	108.899		0.5308	2.389	3.631	9.225	1.811	48.48	2.167	73.7718
2007-06-05	0.3568	8.487	0.1195	33.82	59.71	8.703	3.183	115.049		1.984	8.538	0	24.17	0.6321	15.66	5.538	58.8701
2007-06-20	0.83	11.59	11.76	24.76	29.15	4.351	2.524	85.728		0.1205	9.313	1.412	148.5	24.71	60.25	4.285	250.034
2007-07-04	0.1152	5.578	2.353	24.18	22.7	30.85	11.65	98.0719		0.6265	9.892	26.73	323.2	2.678	104.4	1.575	472.254
2007-07-17	0.5958	6.214	0.4303	26.13	53.56	46.99	5.29	140.439		2.703	19.29	40.2	26.44	0	293.6	2.732	389.266
2007-08-01	9.167	3.453	2.206	28.53	49.87	146.2	6.1905	248.391		3.112	2.365	4.936	9.101	0.2398	73.08	4.595	103.845
2007-08-15	4.698	7.968	24.91	21.81	14.98	110.9	4.272	191.316		0.8215	6.36	7.796	22.78	4.973	102.2	3.084	153.314
2007-08-29	1.429	9.17	9.104	21.18	21.4	91.38	5.535	160.92		1.635	0.6223	5.668	4.828	6.818	130.5	1.123	153.515

## Sheet: Chlorophyll
Table S2	Chlorophyll
Chlorophyll concentration (mg C m-3) in June-August 2004-2007 in lakes Halsjärvi and Valkea-Kotinen.
For Halsjärvi, concentrations for epilimnion and for the entire water column (0-5.5 m) are given separately.
	HALSJÄRVI			VALKEA-KOTINEN
Date	epilimnion	0-5.5 m		0-1 m
1.6.2004	3.69305	21.0014		10.0817
8.6.2004	2.92566	25.6948		12.1153
15.6.2004	2.70983	25.9074		14.9242
21.6.2004	2.2542	30.2688		18.7687
29.6.2004	3.98082	28.6804		21.5328
6.7.2004	5.29976	31.9256		14.3094
13.7.2004	4.31655	33.5943		12.9896
19.7.2004	3.40528	33.916		14.8534
27.7.2004	3.76499	36.3644		16.9579
3.8.2004	4.19664	33.6141		27.9864
5.8.2004	4.53237	28.3036		17.5455
10.8.2004	4.41247	33.08		17.6962
17.8.2004	5.51559	36.2961		15.9433
24.8.2004	6.09113	38.2013		13.7396
31.8.2004	16.3789	49.7642		11.9068
31.5.2005	5.23581	5.2		11.2177
7.6.2005	4.43645	4.44372		23.5592
14.6.2005	2.9976	3.36549		29.9116
20.6.2005	2.9976	3.16837		38.5208
28.6.2005	3.27738	3.35459		22.8838
4.7.2005	1.67866	2.88133		18.142
12.7.2005	8.0036	7.13157		18.4884
19.7.2005	8.27338	7.28145		14.2756
26.7.2005	5.42566	5.08775		15.3808
2.8.2005	6.98441	6.90538		12.9987
9.8.2005	8.23341	7.82283		13.4404
16.8.2005	6.95444	7.65751		11.4634
23.8.2005	9.43245	9.37432		10.8471
30.8.2005	9.03277	8.88744		10.4846
2006-05-30	5.39568	4.85066		4.7701
2006-06-06	5.91527	5.17768		12.0883
2006-06-13	5.07594	5.44292		10.4243
2006-06-19	5.89243	6.017		5.68907
2006-06-27	5.59552	6.66739		7.08766
2006-07-04	4.996	8.89107		9.46477
2006-07-11	5.9952	14.2141		10.2991
2006-07-18	6.38489	13.4129		12.1419
2006-07-25	7.46403	16.5195		12.3514
2006-08-01	5.93525	12.5082		14.0382
2006-08-08	5.1259	14.9226		10.2991
2006-08-15	7.52398	17.4624		10.5263
2006-08-22	8.96283	25.2671		11.0363
2006-08-29	9.17266	12.0231		12.2569
2007-06-05	4.34319	7.81269		4.76952
				5.48894
				8.84626
2007-06-20	6.02518	12.7098		13.4026
				24.9134
2007-07-04	7.03437	15.1079		26.8985
				41.5268
2007-07-17	9.48574	21.8831		31.6547
				17.0564
2007-08-01	13.3993	25.466		12.2569
				12.5899
2007-08-15	5.09592	31.0497		13.3993
				10.8813
2007-08-29	11.301	31.1478		13.2494

## Sheet: Primary production
Table S3	Primary production
Primary production of phytoplankton mg C/m2/d in lakes Halsjärvi and Valkea-Kotinen
during June-August 2004-2006.
Date	HALSJÄRVI (0-3 m)	VALKEA-KOTINEN (0-2 m)
2004-06-01	44.8805	48.7
2004-06-08	120.623	136.1
2004-06-15	102.363	82.6
2004-06-21	95.0365	98.7
2004-06-29	72.6373	68.5
2004-07-06	103.166	92.7
2004-07-13	94.9596	73
2004-07-19	58.4841	88.6
2004-07-27	67.7226	86.7
2004-08-03	67.6759	122
2004-08-10	43.026	123.3
2004-08-17	35.8809	66.7
2004-08-24	44.5987	118.6
2004-08-31	48.8017	44.1
2005-05-31	64.9271	34.4
2005-06-07	51.2909	115.6
2005-06-14	31.4384	104.1
2005-06-20	94.6112	145.4
2005-06-28	87.5905	149.6
2005-07-04	44.6803	101
2005-07-12	153.943	113.4
2005-07-19	72.1286	46.3
2005-07-26	105.766	152.3
2005-08-02	156.318	116.9
2005-08-09	102.03	47.8
2005-08-16	118.307	73.5
2005-08-23	99.9325	47.6
2005-08-30	184.362	57.2
2006-05-30	78.3728
2006-06-07	72.7009	51.1
2006-06-13	207.113
2006-06-19	270.62	165
2006-06-27	38.0708
2006-07-04	87.3678	131.2
2006-07-11	132.816
2006-07-18	121.515	217.4
2006-07-25	126.523
2006-08-01	99.6509	43
2006-08-08	59.3023
2006-08-15	112.244	66.7
2006-08-22	168.458
2006-08-29	92.439	84.5

## Sheet: Respiration
Table S4	Respiration
Respiration of plankton (mg C/m2/d) in lakes Halsjärvi and Valkea-Kotinen
during June-August 2004-2006.
Date	HALSJÄRVI (0-3 m)	VALKEA-KOTINEN (0-2 m)
2004-06-01		521
2004-06-08	107.119	161
2004-06-15	888.475	445
2004-06-21
2004-06-29	84.525	348
2004-07-06	17.5188
2004-07-13	446.913	207
2004-07-19	397.431	208
2004-07-27		228
2004-08-03	77.1937	75
2004-08-10	493.663	319
2004-08-17	712.869	173
2004-08-24	120.344	138
2004-08-31	542.669	173
2005-05-31	60.3813	74
2005-06-07	309.831	127.5
2005-06-14	179.138	142.375
2005-06-20	272.925	180.375
2005-06-28	288.088	131.875
2005-07-04	176.881	194
2005-07-12	406.95	151.125
2005-07-19	169.363	129
2005-07-26	205.475	124.875
2005-08-02	223.312	111
2005-08-09	388.7	107.5
2005-08-16	246.825	92.875
2005-08-23	177.469	78.875
2005-08-30		15
2006-05-30	194.6
2006-06-07	269.9	176
2006-06-13	577.431	271
2006-06-19	367.913	235
2006-06-27		177
2006-07-04	323.712	218
2006-07-11	346.344	237
2006-07-18	273.587	304
2006-07-25	188.55	184
2006-08-01	164.256	175
2006-08-08	151.081	219
2006-08-15	236.05	182
2006-08-22	234.781	172
2006-08-29	276.187	192

## Sheet: Zooplankton
Table S5	Zooplankton
Density of main zooplankton groups (ind L-1) in lakes Halsjärvi and Valkea-Kotinen during June-August 2004-2007
	HALSÄRVI (experimental lake)					VALKEA-KOTINEN (reference lake)
Date
2004	CLADOCERA	COPEPODA	ROTATORIA	PROTOZOA		CLADOCERA	COPEPODA	ROTATORIA	PROTOZOA
1.6.	17.7909	40.1818	114.455	6.81818		0.727273	59.3636	15.5152	0.0606061
15.6.	28.9	72.1818	403.273	16.7273		1.27273	33.7576	4.36364	0
29.6.	25.7364	41	503.909	30.8182		10.6061	31.697	4.36364	0.0606061
13.7.	61.0727	59.2727	313.545	28.1818		23.2727	63.8788	2.66667	0.181818
27.7.	34.7	73.7273	238.364	62.9091		36.9394	94.6061	0.484848	0.30303
10.8.	19.8364	49.5455	199	6.09091		23.0909	87.4545	0.484848	0.242424
24.8.	37.2273	54.5455	984.818	2.09091		10.6061	53.7576	1.45455	0.363636
7.9.	35.7727	50.6364	1334.45	1.54545		5.21212	25.3333	0.484848	0.0606061
2005
7.6.	18.4667	75.7273	276.091	2.45455		4.87879	30.5455	7.27273	0.151515
20.6.	14.7273	73.0909	802.364	7.63636		17.1515	37.3636	4.60606	0.030303
4.7.	42.7182	89.6364	559.273	17.1818		46.697	27.6061	3.87879	0.0606061
19.7.	38.3636	85.3636	632.455	16.5455		33.3636	139.333	0.484848	0.151515
2.8.	35.8	107.909	216.182	145.273		55.9697	124.545	0	0.030303
16.8.	36.4333	45.6364	163.364	43.6364		19.3333	121.242	1.93939	0.0909091
30.8.	74.0833	90.0909	330.818	31.5455		30.3333	76.2727	2.42424	0.0606061
2006
6.6.	32.3818	114.082	442.636	11.5364		1.93939	51.4545	32	0.030303
19.6.	90.7091	101.855	786.364	19.1364		8.93939	31.7576	6.06061	0.212121
4.7.	56.2273	98.8909	377	221.964		28.7576	43.2121	5.57576	0.121212
18.7.	24.7873	130.264	267.691	69.3909		76.4242	147.727	1.45455	0.151515
						54.3636	220.03	3.39394	0.212121
15.8.	43.4091	113.6	373	33.9818		26.1212	230.061	0.242424	0.0606061
2007
5.6.	46.7455	85.3182	773.091	9.26727		9.12121	16.6364	0	0.0909091
20.6.	21.9636	36.1364	406.636	4.99545		13.5455	23.5152	2.18182	0.151515
4.7.	22.7091	93.0909	306.273	33.2636		4.33333	16.8182	40.9697	0.0606061
17.7.	21.3818	71.8636	167.536	20.5364		1.48485	15.6061	111.273	0.0606061
1.8.	34.9455	110.245	337	13.0273		7.63636	26.7879	4.36364	0.030303
15.8.	21.8455	89.3455	247.636	18.5727		8.06061	129.97	1.93939	0.0909091
29.8.	40.6455	38.8636	331.982	11.9545		17.5758	150.455	5.09091	0.030303

## Sheet: Zoobethos
Table S6	Zoobenthos
Densities (ind. m-2) and biomasses (g m-2 ww) of littoral and profundal macroinvertebrates
in lakes Halsjärvi and Valkea-Kotinen in 2004-2007. Asellus=Asellus aquaticus, Ephem=Mayfly nymphs, Odonata=
Dragonfly nymphs, Sialis=Sialis lutaria, Trich=Trichoptera nymphs, Chir=Chironomid larvae, Chaob=Choborid larvae.
Littoral density, Ind. m-2	year	sample	Asellus	Ephem	Odonata	Sialis	Trich	Chir	Total
Halsjärvi	2004	1	94	63	94	0	0	346	597
Halsjärvi	2004	2	0	31	0	0	31	189	314
Halsjärvi	2004	3	94	0	0	31	31	409	597
Halsjärvi	2005	1	1604	1509	126	0	126	1006	4528
Halsjärvi	2005	2	503	472	63	63	0	377	1478
Halsjärvi	2005	3	597	440	94	0	189	566	2013
Halsjärvi	2006	1	597	818	157	0	189	1730	3742
Halsjärvi	2006	2	943	975	31	0	629	818	3685
Halsjärvi	2006	3	472	660	0	0	346	1667	3270
Halsjärvi	2007	1	943	377	94	0	252	409	2327
Halsjärvi	2007	2	1572	409	94	0	283	346	2987
Halsjärvi	2007	3	440	660	126	0	252	1083	2516
Littoral biomass, g m-2			Asellus	Ephem	Odonata	Sialis	Trich	Chir	Total
Halsjärvi	2004	1	0.2799	0.0189	22.6195	0	0	0.283	23.2013
Halsjärvi	2004	2	0	0.0409	0	0	0.0377	0.1038	0.27
Halsjärvi	2004	3	0.3648	0	0	0.0503	0.0566	0.3616	1.08
Halsjärvi	2005	1	3.69	0.76	8.52	0	0.14	0.32	13.72
Halsjärvi	2005	2	2.87	0.2	0.12	0.75	0	0.19	4.12
Halsjärvi	2005	3	2.28	0.22	0.37	0	0.3	0.4	3.8
Halsjärvi	2006	1	2.14	0.55	1.25	0	0.07	0.7	4.94
Halsjärvi	2006	2	2.68	0.63	0.17	0	0.46	5.94	15.9
Halsjärvi	2006	3	1.08	0.43	0	0	0.21	0.9277	3.51
Halsjärvi	2007	1	2.08	0.2	0.81	0	0.2	0.19	4.05
Halsjärvi	2007	2	5.02	0.27	2.64	0	0.53	0.3	9.53
Halsjärvi	2007	3	1.42	0.43	0	0	0.19	0.64	6.63
Littoral density, Ind. m-2			Asellus	Ephem	Odonata	Sialis	Trich	Chir	Total
Valkea-Kotinen	2004	1	31	6635	220	0	283	4088	11352
Valkea-Kotinen	2004	2	63	4843	31	0	314	4528	9811
Valkea-Kotinen	2004	3	157	0	94	63	409	4591	6289
Valkea-Kotinen	2005	1	31	1478	63	0	314	4057	6289
Valkea-Kotinen	2005	2	63	1761	157	0	94	3491	5629
Valkea-Kotinen	2005	3	472	1572	126	31	220	6698	9340
Valkea-Kotinen	2006	1	220	2516	220	0	283	7830	11226
Valkea-Kotinen	2006	2	314	1038	94	0	157	8176	10063
Valkea-Kotinen	2006	3	1352	252	31	94	346	10440	12736
Valkea-Kotinen	2007	1	94	3113	409	31	283	2704	6730
Valkea-Kotinen	2007	2	0	786	0	0	157	2799	3994
Valkea-Kotinen	2007	3	943	252	126	63	220	2767	4528
Littoral biomass, g m-2			Asellus	Ephem	Odonata	Sialis	Trich	Chir	Bkok
Valkea-Kotinen	2004	1	0.0818	2.2201	10.9025	0	1.283	0.5818	15.195
Valkea-Kotinen	2004	2	0.5881	2.0503	1.1635	0	4.4528	2.0912	10.349
Valkea-Kotinen	2004	3	0.0723	0.2547	1.5409	0.6981	2.6887	1.4214	8.3459
Valkea-Kotinen	2005	1	0.08	2.22	5.23	0	1.36	0.84	13.97
Valkea-Kotinen	2005	2	0.27	0.85	7.94	0	0.22	2.81	20.89
Valkea-Kotinen	2005	3	3.92	0.97	4.34	0.17	2.02	1.33	12.96
Valkea-Kotinen	2006	1	1.38	0.74	1.44	0	1.44	2.12	7.61
Valkea-Kotinen	2006	2	0.96	0.37	1.72	0	1.48	6.4	12.81
Valkea-Kotinen	2006	3	7.76	0.08	1.7	1.3	1.06	3.48	16.39
Valkea-Kotinen	2007	1	0.513	0.714	11.01	0.04	0.65	0.48	13.8
Valkea-Kotinen	2007	2	0	0.28	0.72	0	0.48	0.72	2.01
Valkea-Kotinen	2007	3	0.12	0.094	2.97	2.15	0.53	0.91	11.55
Profundal density, Ind. m-2			Chaob	Chir
Halsjärvi	2004	1	519
Halsjärvi	2004	2	444
Halsjärvi	2004	3	556
Halsjärvi	2005	1		148
Halsjärvi	2005	2		37
Halsjärvi	2005	3		37
Halsjärvi	2006	1		148
Halsjärvi	2006	2		74
Halsjärvi	2006	3		74
Halsjärvi	2007	1		74
Halsjärvi	2007	2		37
Halsjärvi	2007	3		37
Profundal biomass, g m-2			Chaob	Chir
Halsjärvi	2004	1	0.03
Halsjärvi	2004	2	0.04
Halsjärvi	2004	3	0.04
Halsjärvi	2005	1		0.26
Halsjärvi	2005	2		0.2
Halsjärvi	2005	3		0.06
Halsjärvi	2006	1		0.4
Halsjärvi	2006	2		0.21
Halsjärvi	2006	3		0.2
Halsjärvi	2007	1		0.28
Halsjärvi	2007	2		0.25
Halsjärvi	2007	3		0.14
Profundal density, Ind. m-2			Chaob	Chir
Valkea-Kotinen	2004	1	519
Valkea-Kotinen	2004	2	222	37
Valkea-Kotinen	2004	3	333
Valkea-Kotinen	2005	1	741
Valkea-Kotinen	2005	2	481
Valkea-Kotinen	2005	3	630
Valkea-Kotinen	2006	1	1333
Valkea-Kotinen	2006	2	2148
Valkea-Kotinen	2006	3	1667
Valkea-Kotinen	2007	1	37	1963
Valkea-Kotinen	2007	2	2000
Valkea-Kotinen	2007	3	37	1333
Profundal biomass, g m-2			Chaob	Chir
Valkea-Kotinen	2004	1	1.21
Valkea-Kotinen	2004	2	0.21	0.14
Valkea-Kotinen	2004	3	0.46
Valkea-Kotinen	2005	1	1.4
Valkea-Kotinen	2005	2	0.96
Valkea-Kotinen	2005	3	1.46
Valkea-Kotinen	2006	1	2.93
Valkea-Kotinen	2006	2	6
Valkea-Kotinen	2006	3	3.64
Valkea-Kotinen	2007	1	0.01	3.52
Valkea-Kotinen	2007	2	3.41
Valkea-Kotinen	2007	3	0.01	2.7

## Sheet: Fish
Table S7	Fish
Gillnet catches from lakes Halsjärvi and Valkea-Kotinen									Annual length increments (mm) of perch in their first and second summer in lakes Halsjärvi
in 2004-2008. NPUE=total number of fish in a NORDIC net in one night,									and Valkea-Kotinen during the years 2002-2007.
WPUE=total biomass (g) of fish in a NORDIC net in one night.
									1st year growth, mm						2nd year growth, mm
		Halsjärvi			Valkea-Kotinen				Halsjärvi			Valkea-Kotinen			Halsjärvi			Valkea-Kotinen
Year		NPUE	WPUE		NPUE	WPUE			n=87			n=151			n=146			n=311
2004		13	203		8	268			63.9266	2002		60.6034	2002		19.3977	2002		27.3842	2002
2004		0	0		1	38			61.7225	2002		61.8599	2002		18.5505	2002		27.3155	2002
2004		11	147		10	657			64.8909	2002		57.5202	2002		19.2581	2002		28.7299	2002
2004		8	83		20	1855			58.5783	2002		57.9293	2002		22.8487	2002		28.9882	2002
2004		9	139		0	0			62.3114	2002		58.6627	2002		23.385	2002		29.27	2002
2004		16	554		0	0			67.9875	2002		65.7817	2002		9.95837	2002		30.7094	2002
2004		35	429		7	293			67.1975	2002		71.6709	2002		12.2662	2002		38.2238	2002
2004		9	208		3	4			65.7375	2002		60.2214	2002		12.3839	2002		40.7371	2002
2005		64	1798		30	787			65.8069	2002		67.9162	2002		19.5087	2002		31.7176	2002
2005		25	580		16	1054			67.1308	2002		65.7983	2002		15.523	2002		33.8226	2002
2005		26	421		10	385			58.9259	2002		57.364	2002		19.2495	2002		42.1728	2002
2005		23	373		3	650			62.2473	2002		63.3702	2002		24.689	2002		26.3152	2002
2005		17	278		16	889			61.7244	2002		62.3365	2002		21.5426	2002		38.329	2002
2005		2	16		0	0			66.3203	2002		57.5781	2002		25.8044	2002		36.4138	2002
2005		11	326		5	660			63.6602	2002		66.1227	2002		21.2994	2002		28.8794	2002
2005		17	740		2	183			63.7843	2002		64.7881	2002		23.1751	2002		28.793	2002
2006		61	846		27	1567			64.5038	2002		56.0677	2002		27.0252	2002		31.4413	2002
2006		17	97		10	97			62.2858	2002		65.4164	2002		19.6908	2002		33.6623	2002
2006		70	1308		17	1146			61.2936	2002		66.3385	2002		19.113	2002		34.6438	2002
2006		11	210		118	1110			63.4013	2002		72.37	2002		22.9636	2002		46.7475	2002
2006		14	156		30	1274			66	2003		58.125	2002		22.7821	2002		34.1387	2002
2006		30	429		1	29			57.6135	2003		59.3928	2002		13.2756	2002		22.6609	2002
2006		10	153		1	1			58.551	2003		58.5686	2002		17.1769	2002		29.3028	2002
2006		9	99		5	493			68.4441	2003		56.3929	2002		16.6284	2002		28.5469	2002
2007		31	457		31	1106			60.8248	2003		67.1645	2002		14.8185	2002		31.9987	2002
2007		23	1221		19	476			58.6471	2003		51.3511	2003		15.4283	2002		26.9165	2002
2007		13	172		0	0			47.273	2004		53.2038	2003		17.7521	2003		26.4389	2002
2007		75	1124		2	165			49.4464	2004		53.3346	2003		18.7527	2003		30.0064	2002
2007		2	46		21	1343			51.1768	2004		55.3923	2003		20.2756	2003		32.3567	2002
2007		117	1226		28	699			59.3593	2004		56.0044	2003		15.6797	2003		35.8897	2002
2007		21	373		1	368			52.9623	2004		62.7915	2003		18.3398	2003		28.551	2002
2007		9	196		0	0			52.5135	2004		56.8714	2003		19.2157	2003		34.2449	2002
2008		53	789		54	2563			52.8579	2004		60.0613	2003		19.4962	2003		29.9732	2002
2008		25	386		25	1361			51.8756	2004		72.0786	2003		21.7142	2003		27.6789	2002
2008		19	1299		6	847			51.8756	2004		51.1404	2003		23.7064	2003		31.9094	2002
2008		0	0		5	1771			60.9789	2004		53.0384	2003		21.5987	2003		32.2604	2002
2008		31	1089		18	2160			57.7137	2004		54.7051	2003		24.7176	2003		40.6405	2002
2008		39	568		32	1525			52.1707	2004		55.7749	2003		25.8251	2003		33.9237	2002
2008		11	396		3	3			65.1349	2004		55.7749	2003		22.2538	2003		33.4465	2002
2008		23	329		0	0			68.4311	2004		57.7191	2003		24.3762	2003		28.6233	2002
									52.2568	2005		55.2331	2003		23.759	2003		26.6244	2002
									47.3219	2005		64.094	2003		19.6847	2003		39.5163	2002
									53.7254	2005		49.6379	2003		25.0539	2003		44.8059	2002
									51.6957	2005		56.3279	2003		26.485	2003		33.4888	2002
									59.5985	2005		60.5614	2003		25.0399	2003		28.6684	2002
									58.7134	2005		68.002	2003		30.9253	2003		38.0315	2002
									57.5814	2005		58.4161	2003		25.7297	2003		28.3698	2002
									60.0442	2005		53.4913	2003		28.2313	2003		34.833	2002
									60.1302	2005		53.7356	2003		16.0406	2003		31.3466	2002
									61.4788	2005		59.3771	2003		19.6589	2003		24.7739	2003
									60.2189	2005		52.2592	2003		14.6327	2003		28.3295	2003
									60.5722	2005		50.9971	2003		17.8328	2003		25.8667	2003
									63.5195	2005		50.9447	2003		16.3685	2003		27.1458	2003
									65.0672	2005		53.2958	2003		17.3172	2003		33.6997	2003
									65.3368	2005		43.8911	2003		18.24	2003		21.5554	2003
									62.2215	2005		54.1113	2003		23.9006	2003		35.3371	2003
									60.4097	2005		56.7379	2003		21.1216	2003		34.1799	2003
									66.3021	2005		58.2995	2003		19.7238	2003		31.4881	2003
									70.8171	2005		58.2143	2003		14.8367	2003		23.3989	2003
									57.0581	2005		58.8175	2003		14.5626	2003		14.3828	2003
									59.444	2006		53.6295	2003		12.4378	2003		29.8755	2003
									52.5165	2006		55.5387	2003		15.0713	2003		24.4518	2003
									62.245	2006		63.7338	2003		19.8599	2003		34.7943	2003
									51.4063	2006		57.2317	2003		13.9691	2003		26.501	2003
									54.1903	2006		50.7969	2003		16.0726	2003		24.8839	2003
									59.1303	2006		59.3328	2003		19.9673	2003		28.297	2003
									67.645	2006		57.5534	2003		17.5251	2003		32.7999	2003
									64.1364	2006		59.5888	2003		19.0046	2003		31.9103	2003
									65.0458	2006		51.5854	2003		20.0562	2003		43.4207	2003
									65.3966	2006		54.5071	2003		24.1563	2003		26.0282	2003
									62.934	2006		57.6338	2003		14.5654	2003		29.0115	2003
									63.5634	2006		62.1415	2003		19.4969	2003		32.4334	2003
									57.1806	2006		73.882	2003		17.4595	2003		27.5461	2003
									55.993	2006		56.7342	2003		17.1055	2003		34.8911	2003
									65.263	2006		62.2276	2003		16.1786	2003		31.1467	2003
									57.1806	2006		62.2462	2003		20.8936	2003		27.4562	2003
									66.9024	2006		63.625	2003		21.6475	2003		38.6254	2003
									67.5419	2006		52.5794	2003		20.7385	2003		33.8903	2003
									75.0453	2006		48.9681	2003		23.8309	2003		38.9702	2003
									55.8989	2006		59.7448	2003		13.869	2003		31.3415	2003
									64	2007		55.0964	2003		24.238	2003		25.6808	2003
									65	2007		64.0082	2003		18.6242	2003		27.1212	2003
									62	2007		71.3602	2003		17.21	2003		35.7247	2003
									65	2007		55.8838	2003		19.8551	2003		34.89	2003
									66	2007		58.5198	2003		21.371	2003		43.5159	2003
									66	2007		61.5925	2003		18.6518	2003		26.1234	2003
									67	2007		58.5194	2003		21.349	2003		31.7961	2003
												62.9124	2003		27.686	2004		31.5422	2003
												51.5252	2004		19.8535	2004		33.5945	2003
												47.4455	2004		16.453	2004		37.1866	2003
												50.9358	2004		14.2128	2004		15.5848	2004
												51.349	2004		18.3842	2004		17.7787	2004
												52.4423	2004		18.9692	2004		22.2476	2004
												50.4586	2004		29.1969	2005		26.9035	2004
												49.5935	2004		29.667	2005		22.1133	2004
												49.6016	2004		28.6748	2005		19.1389	2004
												46.9681	2004		29.1718	2005		16.3238	2004
												45.3054	2004		36.8985	2005		23.2893	2004
												56.3038	2004		17.1575	2005		23.063	2004
												45.6718	2005		26.1469	2005		28.3737	2004
												45.968	2005		19.4083	2006		31.023	2004
												45.7495	2005		21.1797	2006		27.4783	2004
												48.676	2005		27.7599	2006		28.5344	2004
												45.9302	2005		20.8147	2006		33.4592	2004
												49.7227	2005		25.9487	2006		40.563	2004
												44.7898	2005		27.6398	2006		32.6076	2004
												49.114	2005		27.7901	2006		16.2879	2004
												47.273	2005		29.1555	2006		20.677	2004
												46.5375	2005		32.5182	2006		19.3253	2004
												47.3361	2005		23.7545	2006		19.6511	2004
												46.3383	2005		32.9498	2006		18.0274	2004
												45.7224	2005		26.5005	2006		21.3591	2004
												53.8485	2005		27.1259	2006		27.8835	2004
												45.5204	2005		22.9228	2006		21.3205	2004
												49.2522	2005		31.2678	2006		15.902	2004
												51.0426	2005		29.0617	2006		27.4557	2004
												48.7062	2005		27.6402	2006		14.6496	2004
												46.7777	2005		26.8079	2006		19.1385	2004
												44.195	2005		25.6987	2006		21.494	2004
												43.9885	2006		30.4349	2006		26.2914	2004
												44.5638	2006		28.3378	2006		26.277	2004
												42.7413	2006		28.7797	2006		21.877	2004
												46.6182	2006		29.7429	2006		22.2598	2004
												46.7872	2006		24.6512	2006		23.1664	2004
												48.0207	2006		27.7593	2006		19.7103	2004
												49.1966	2006		23.2155	2006		25.9033	2004
												48.9934	2006		20.4232	2006		29.5233	2004
												52.4265	2006		24.0278	2006		30.1859	2004
												47.9399	2006		27.8931	2006		27.0768	2004
												48.1281	2006		30.7497	2006		29.0625	2004
												47.2756	2006		34.0231	2006		25.4378	2004
												50.8194	2006		31.499	2006		22.4279	2004
												50.2275	2006		36.0342	2006		29.5948	2004
												46.5689	2006		37.9226	2006		16.3877	2004
												46.3061	2006		28.8965	2006		22.2016	2004
												53.2081	2006		24.9607	2006		32.4092	2004
												45.8363	2006		26.8819	2006		19.9656	2004
												47.3246	2006		32.3605	2006		21.0258	2004
												51.8305	2006		25.1991	2007		39.2705	2004
												48.8159	2006		19.2674	2007		21.6141	2004
												44.908	2006		26.1969	2007		27.5389	2004
												45.3456	2006		25.5984	2007		36.1708	2004
												44.7424	2006		30.5116	2007		42.3789	2004
												45.0706	2006		29.4325	2007		34.1276	2004
												59.7931	2006		21.273	2007		26.7125	2004
												59.4958	2006					21.4219	2004
												49.3248	2006					21.5249	2004
												43.5598	2007					15.7056	2004
												47.7752	2007					18.7264	2004
												44.3727	2007					21.8863	2004
												56.8664	2007					26.4347	2004
																		22.1656	2004
																		22.5011	2004
																		20.458	2004
																		22.527	2004
																		22.9176	2004
																		23.5432	2004
																		26.9777	2004
																		23.7714	2004
																		30.1723	2004
																		24.5328	2004
																		26.0935	2004
																		24.6052	2004
																		33.5682	2004
																		30.0598	2004
																		18.003	2004
																		17.8117	2004
																		14.8293	2004
																		28.7108	2004
																		27.699	2004
																		27.7031	2004
																		21.5222	2004
																		24.7958	2004
																		28.7306	2004
																		21.5164	2004
																		23.5284	2004
																		28.2831	2004
																		30.2344	2004
																		28.8679	2004
																		30.3274	2004
																		20.5385	2004
																		19.6235	2004
																		25.1467	2005
																		35.7504	2005
																		33.3059	2005
																		38.0736	2005
																		37.1141	2005
																		20.7015	2005
																		30.0627	2005
																		27.1908	2005
																		41.5856	2005
																		32.6357	2005
																		33.1118	2005
																		35.2663	2005
																		32.3595	2005
																		26.3566	2005
																		30.0281	2005
																		24.9788	2005
																		28.2422	2005
																		26.8326	2005
																		27.6433	2005
																		36.0051	2005
																		29.1917	2005
																		39.9325	2005
																		37.6159	2005
																		29.8371	2005
																		32.991	2005
																		25.153	2005
																		26.0901	2006
																		33.487	2006
																		30.9745	2006
																		38.5986	2006
																		30.7099	2006
																		37.6402	2006
																		44.5803	2006
																		20.9516	2006
																		28.4157	2006
																		30.7706	2006
																		30.122	2006
																		35.9507	2006
																		34.8487	2006
																		33.3193	2006
																		31.9368	2006
																		34.0693	2006
																		40.9315	2006
																		32.1671	2006
																		41.8934	2006
																		22.031	2006
																		26.0388	2006
																		24.9602	2006
																		21.2818	2006
																		26.9431	2006
																		23.4094	2006
																		40.1513	2006
																		28.764	2006
																		36.6308	2006
																		31.5744	2006
																		30.8045	2006
																		26.9813	2006
																		40.7114	2006
																		36.9447	2006
																		37.8467	2006
																		48.0234	2006
																		33.7669	2006
																		30.0413	2006
																		32.0468	2006
																		34.6132	2006
																		29.5036	2006
																		27.224	2006
																		29.0269	2006
																		46.5112	2006
																		28.1207	2006
																		23.2716	2006
																		28.4269	2006
																		39.2416	2006
																		34.952	2006
																		35.3958	2006
																		37.1517	2006
																		26.0926	2006
																		42.6545	2006
																		30.911	2006
																		32.4287	2006
																		29.3123	2006
																		27.413	2006
																		29.3154	2006
																		38.228	2006
																		41.9933	2006
																		34.2165	2006
																		36.0668	2006
																		31.6475	2007
																		30.7177	2007
																		28.1744	2007
																		28.0617	2007
																		28.0192	2007
																		29.9694	2007
																		31.6948	2007
																		27.9373	2007
																		27.1864	2007
																		29.471	2007
																		31.0823	2007
																		34.2487	2007
																		31.4594	2007
																		36.0609	2007
																		39.9332	2007
																		25.5343	2007
																		27.9011	2007
																		27.3704	2007
																		33.0113	2007
																		38.1136	2007
																		39.3423	2007
																		34.9958	2007
																		30.921	2007
																		33.9688	2007
																		28.0919	2007
																		35.6816	2007
																		24.1064	2007
																		30.5039	2007
																		34.121	2007
																		40.4434	2007
																		31.401	2007
																		24.3724	2007
																		31.1744	2007
																		26.636	2007
																		33.6495	2007
																		34.9929	2007
																		28.9882	2007
																		30.2455	2007
																		29.0666	2007
																		26.0014	2007
																		32.3309	2007
																		27.4723	2007
